# Supplementary material for: Solid phase extraction based on the phase transition of poly(N-isopropylacrylamide): the extraction behaviour of lanthanide(iii) ions in highly acidic solutions
Source: Royal Society of Chemistry journal article supplement (doi:10.1039/c7re00060j), 2017-12-14
Supplement: c7re00060j1.pdf [file c7re00060j1.pdf]

Reaction Chemistry & Engineering

Supplementary Information

**Solid phase extraction based on the phase transition of poly(*N*-isopropylacrylamide): the extraction behaviour of lanthanide(III) ions in highly acidic solutions**

Ki Chul Park, Haruka Tateno, Takehiko Tsukahara

Laboratory for Advanced Nuclear Energy, Institute of Innovative Research,  
Tokyo Institute of Technology

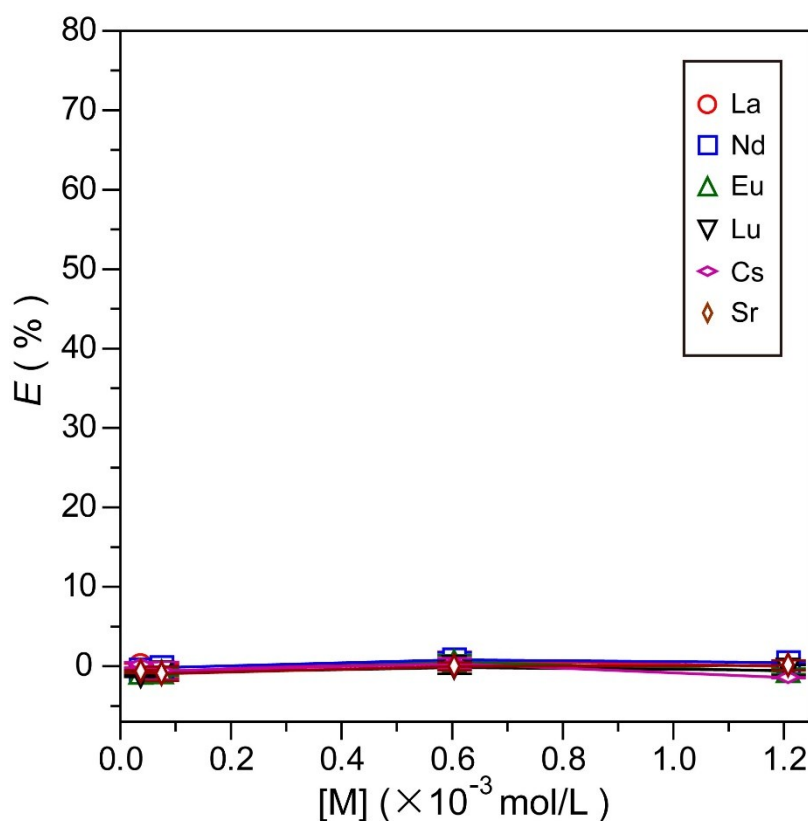

**Fig. S1** Extraction percentage obtained in the absence of CMPO. [M]: initial concentration of each metal ions. The quantitative condition: PNIPAAm; 30.8 mg, [HNO<sub>3</sub>] = 1.0 mol/L, solution volume; 15 mL. In all experiments, the complexation process and phase separation were carried out by vigorous stirring at 20 °C for 1 h and at 40 °C for 1 h, respectively.

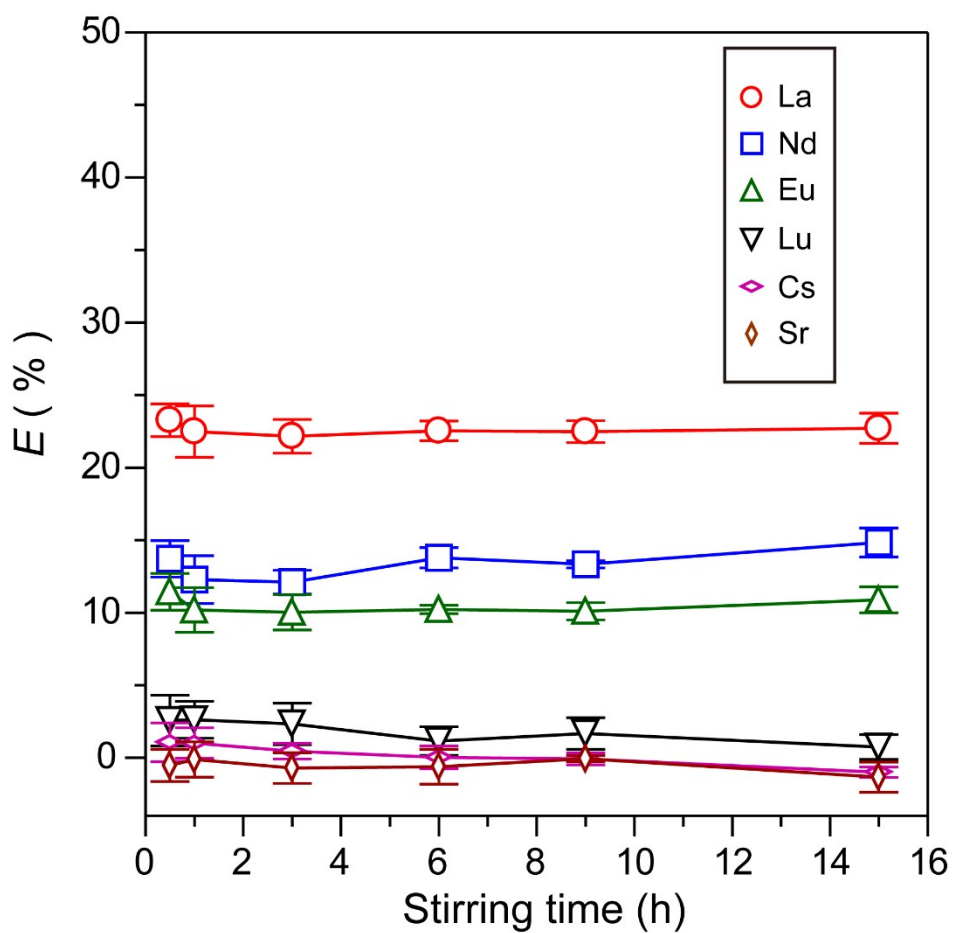

**Fig. S2** Extraction percentage plotted with stirring time in complexation process before phase separation. The quantitative condition: PNIPAAm; 30.8 mg, CMPO; 11.1 mg,  $[Ln] = [Cs] = [Sr] = 1.21$  mmol/L,  $[HNO_3] = 1.0$  mol/L, solution volume; 15 mL. The complexation process was kept at 20°C, and subsequent phase separation was conducted by vigorous stirring at 40 °C for 1 h in all experiments.
